# Supplementary material for: BCG Cell Wall Skeleton As a Vaccine Adjuvant Protects Both Infant and Old-Aged Mice from Influenza Virus Infection
Source: MDPI journal article supplement (doi:10.3390/biomedicines9050516), 2021-05-05
Supplement: s1 [file s1]

# BCG Cell Wall Skeleton As a Vaccine Adjuvant Protects Both Infant and Old-Aged Mice from Influenza Virus Infection

Ki-Hye Kim <sup>1</sup>, Young-Tae Lee <sup>1</sup>, Yoonsuh Park <sup>1</sup>, Eun-Ju Ko <sup>1,2</sup>, Yu-Jin Jung <sup>1</sup>, Yu-Jin Kim <sup>1,3</sup>, Eun-Kyeong Jo <sup>4,5</sup> and Sang-Moo Kang <sup>1,\*</sup>

## Supplementary Information

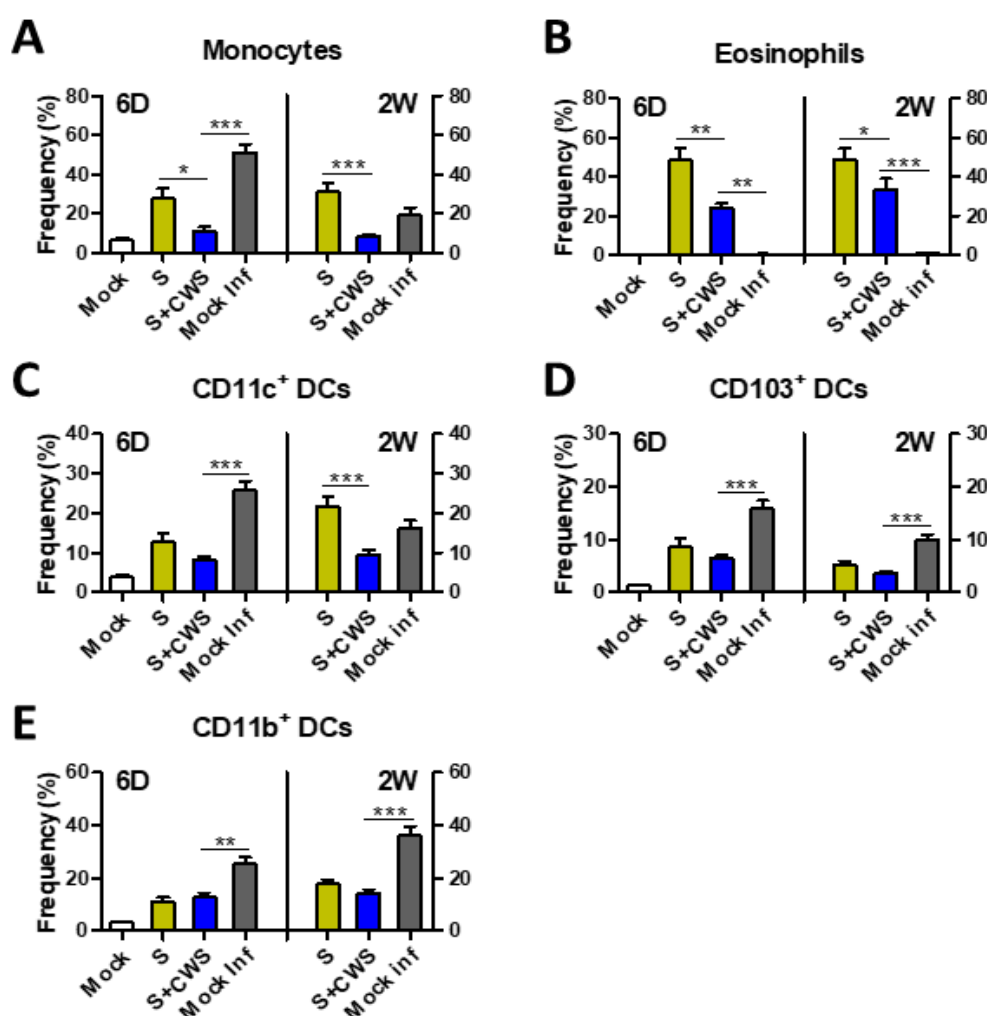

**Figure S1.** The frequency of inflammatory and antigen presenting cells in the lungs after challenge infection. Cellular phenotypes were determined in the lung samples collected at 7 dpi with A/Cal virus by flow cytometry. (A-B) Both monocytes and eosinophils are presented in percentages out of the total gated CD11b<sup>+</sup> cells in lung cells. (A) Monocytes (CD11b<sup>+</sup>Ly6c<sup>hi</sup>F4/80<sup>+</sup>), (B) Eosinophils (CD11b<sup>+</sup>CD11c<sup>+</sup>SiglecF<sup>+</sup>). (C) CD11c<sup>+</sup> dendritic cells (DCs, CD45<sup>+</sup>F4/80<sup>+</sup>CD11c<sup>+</sup>MHCII<sup>hi</sup>) presented in percentages out of total gated CD45<sup>+</sup>F4/80<sup>+</sup> cells in lung cells. (D and E) CD103<sup>+</sup> DCs (CD45<sup>+</sup>F4/80<sup>+</sup>CD11c<sup>+</sup>MHCII<sup>hi</sup>CD11b<sup>+</sup>CD103<sup>+</sup>) and CD11b<sup>+</sup> DCs (CD45<sup>+</sup>F4/80<sup>+</sup>CD11c<sup>+</sup>MHCII<sup>hi</sup>CD11b<sup>+</sup>CD103<sup>+</sup>) are presented in percentages out of the total gated CD45<sup>+</sup>F4/80<sup>+</sup>CD11c<sup>+</sup>MHCII<sup>hi</sup> cells in the Lung of 6D and 2W age mice. Statistical significance was calculated by using one-way ANOVA and a Dunnett's multiple-comparison test. Error bars indicate the mean  $\pm$  SEM. \*,  $p < 0.05$ , \*\*,  $p < 0.01$ , \*\*\*,  $p < 0.001$ .

**Table S1.** Cytokine levels after *in vitro* stimulation of BMDMs and BMDCs from wild type BALB/C and C57BL/6 mice. Cytokines in culture supernatants were presented in concentrations (pg/ml) after incubation of BMDCs and BMDMs with a stimulator, medium control or BCG-CWS (10 µg/ml) for 24 hours.

**Table 1. Cytokine levels after *in vitro* stimulation of BMDCs and BMDMs**

| Mice              | BALB/c             |                    |                    |                    |                   |                    |                 |               | C57BL6            |                   |                 |
|-------------------|--------------------|--------------------|--------------------|--------------------|-------------------|--------------------|-----------------|---------------|-------------------|-------------------|-----------------|
| Cell              | BMDCs              |                    |                    |                    | BMDMs             |                    |                 |               | BMDMs             |                   |                 |
| Cytokines (pg/mL) | TNF-α              | IL-6               | IL-12              | IL-10              | TNF-α             | IL-6               | IL-12           | IL-10         | TNF-α             | IL-6              | IL-12           |
| Control           | -                  | -                  | -                  | -                  | -                 | -                  | -               | -             | -                 | -                 | -               |
| CWS (10µg/ml)     | 4,597.4<br>± 563.1 | 4,163.8<br>± 465.4 | 1,301.3<br>± 197.2 | 1,190.4<br>± 184.2 | 5,457.9<br>± 66.6 | 2,298.8<br>± 204.8 | 472.8<br>± 89.8 | 241<br>± 10.4 | 6471.2<br>± 800.7 | 3586.7<br>± 104.8 | 874.7<br>± 35.2 |
